# Supplementary material for: Disproportionation of a 2,2-diphenyl-1-picrylhydrazyl radical as a model of reactive oxygen species catalysed by Lewis and/or Brønsted acids
Source: Royal Society of Chemistry journal article supplement (doi:10.1039/c3cc47819j), 2013-11-07
Supplement: c3cc47819j.pdf [file c3cc47819j.pdf]

## Electronic Supplementary Information (ESI)

# Disproportionation of a 2,2-diphenyl-1-picrylhydrazyl radical as a model of reactive oxygen species catalyzed by Lewis and/or Brønsted acids

**Ikuo Nakanishi,<sup>\*a</sup> Tomonori Kawashima,<sup>a</sup> Kei Ohkubo,<sup>b</sup> Tsukasa Waki,<sup>ac</sup>  
Yoshihiro Uto,<sup>d</sup> Tadashi Kamada,<sup>ac</sup> Toshihiko Ozawa,<sup>e</sup>  
Ken-ichiro Matsumoto<sup>a</sup> and Shunichi Fukuzumi<sup>\*bf</sup>**

<sup>a</sup> *Research Center for Charged Particle Therapy, National Institute of Radiological Sciences (NIRS), Inage-ku, Chiba 263-8555, Japan.*

<sup>b</sup> *Department of Material and Life Science, Graduate School of Engineering, Osaka University, ALCA, Japan Science and Technology Agency (JST), Suita, Osaka 565-0871, Japan.*

<sup>c</sup> *Graduate School of Medial and Pharmaceutical Sciences, Chiba University, Chiba 260-8670, Japan.*

<sup>d</sup> *Department of Life System, Institute of Technology and Science, Graduate School, The University of Tokushima, Minamijosanjima-cho, Tokushima 770-8506, Japan.*

<sup>e</sup> *Department of Health Pharmacy, Yokohama College of Pharmacy, Yokohama, Kanagawa 245-0066, Japan.*

<sup>f</sup> *Department of Bioinspired Science, Ewha Womans University, Seoul, 120-750, Korea.*

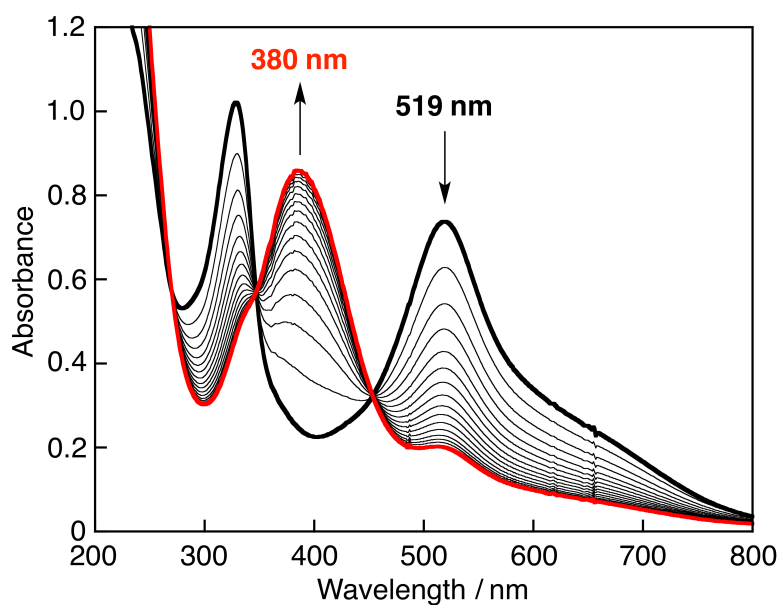

**Fig. S1** Spectral change of DPPH• ( $6.5 \times 10^{-4}$  M) during electrolysis using a spectroelectrochemical cell (1 mm id) (BAS) at +1.00 V vs. SCE with Pt working electrode in MeCN (0.1 M Bu<sub>4</sub>NClO<sub>4</sub>) at 298 K.

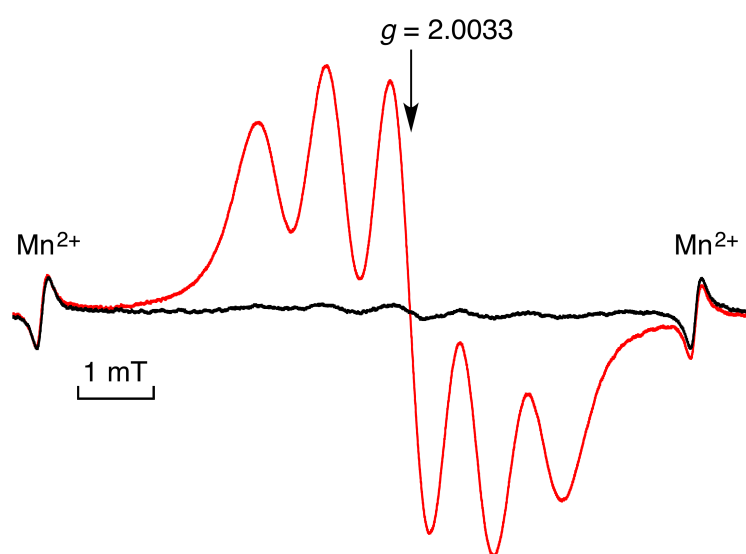

**Fig. S2** EPR spectra of DPPH• ( $1.3 \times 10^{-3}$  M) in the absence (red line) and presence (black line) of Sc(OTf)<sub>3</sub> ( $9.7 \times 10^{-3}$  M) in MeCN at 298 K.

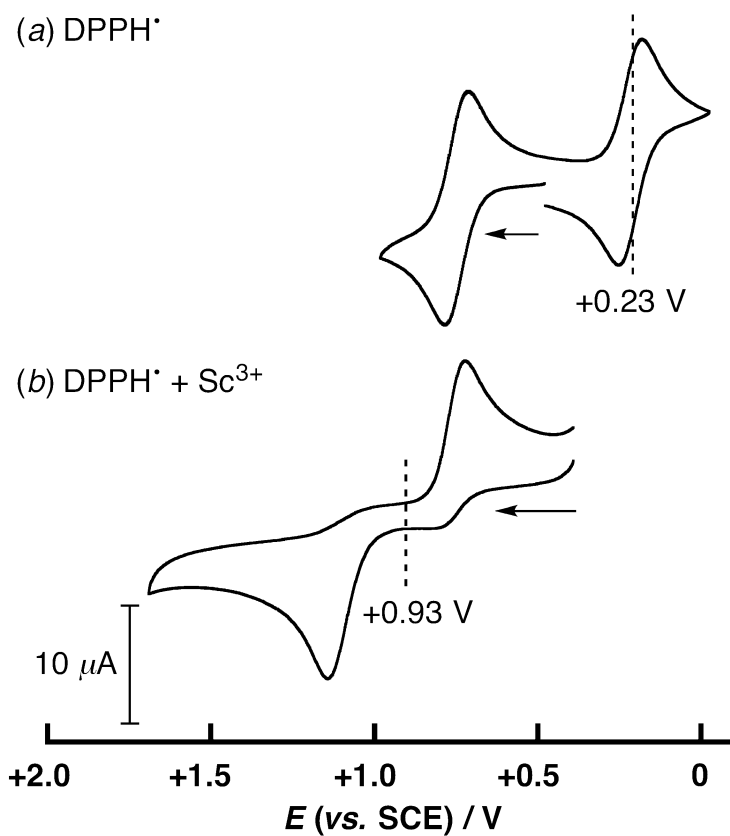

**Fig. S3** Cyclic voltammograms of DPPH• ( $2.0 \times 10^{-3}$  M) in the absence of Sc(OTf)<sub>3</sub> (a) and in the presence of Sc(OTf)<sub>3</sub> ( $2.0 \times 10^{-3}$  M) (b) in deaerated MeCN containing 0.1 M Bu<sub>4</sub>NClO<sub>4</sub> using a Pt working electrode at 298 K. Sweep rate: 100 mV s<sup>-1</sup>. Arrows denote starting points and the direction of scanning.

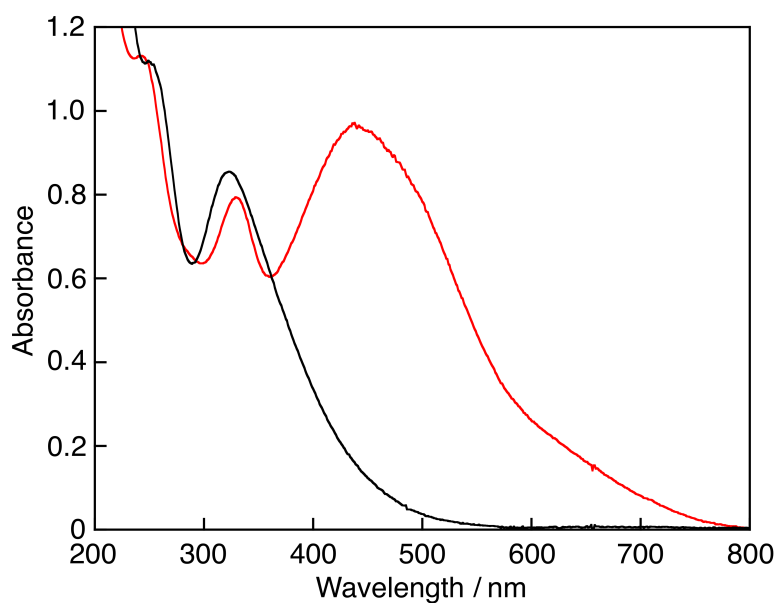

**Fig. S4** UV-vis spectra of DPPH<sup>-</sup> generated by electrochemical one-electron reduction of DPPH<sup>\*</sup> ( $1.3 \times 10^{-3}$  M) using a spectroelectrochemical cell (0.5 mm id) (BAS) at  $-0.01$  V vs. SCE with Pt working electrode in the absence (red line) and presence (black line) of Sc(OTf)<sub>3</sub> ( $6.8 \times 10^{-3}$  M) in MeCN (0.1 M Bu<sub>4</sub>NClO<sub>4</sub>) at 298 K.

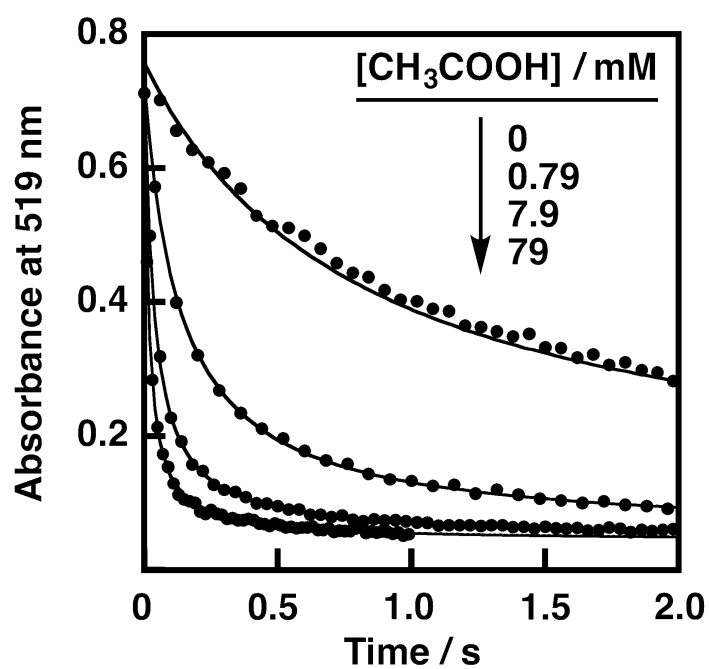

**Fig. S5** Time courses of the absorbance change at 519 nm observed upon mixing of DPPH<sup>•</sup> ( $6.0 \times 10^{-5}$  M) with Sc(OTf)<sub>3</sub> ( $8.0 \times 10^{-3}$  M) in deaerated MeCN containing CH<sub>3</sub>COOH (0, 0.79, 7.9 and 79 mM) at 298 K.

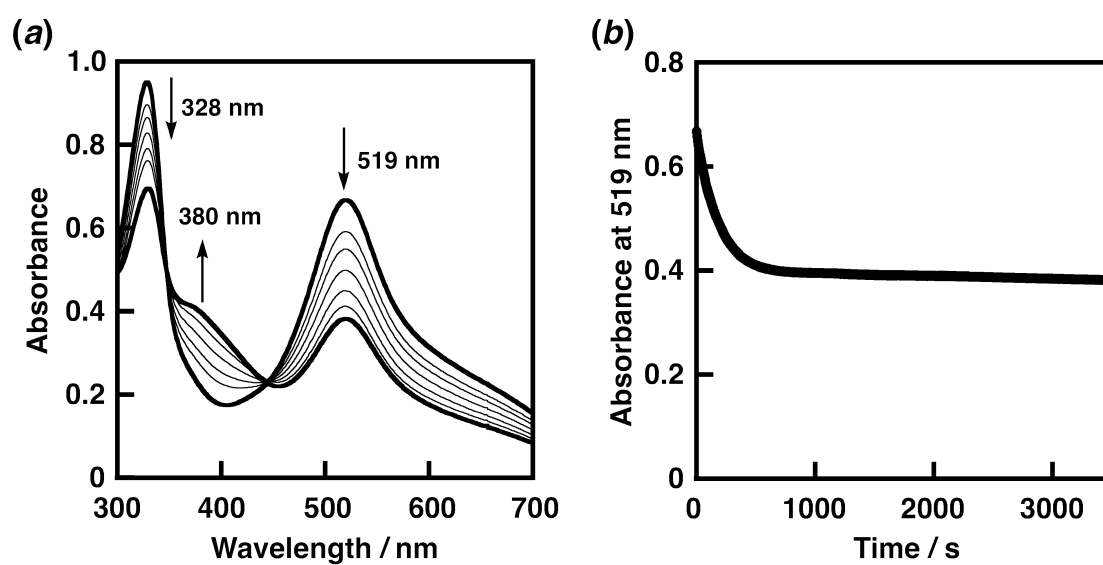

**Fig. S6** (a) Spectral changes observed upon mixing of DPPH• ( $6.7 \times 10^{-5}$  M) with LiClO<sub>4</sub> (0.2 M) and CH<sub>3</sub>COOH (0.2 M) in deaerated MeCN at 298 K. (b) Time course of the absorbance change at 519 nm.
